# Supplementary material for: Amine-assisted synthesis of the Ni3Fe alloy encapsulated in nitrogen-doped carbon for high-performance water splitting
Source: Royal Society of Chemistry journal article supplement (doi:10.1039/d2ta09549a), 2023-01-01
Supplement: d2ta09549a1.pdf [file d2ta09549a1.pdf]

## Supporting Information

### **Amine-assisted synthesis of Ni<sub>3</sub>Fe alloy encapsulated in nitrogen-doped carbon for high-performance water splitting**

Mengzhi Guo,<sup>a</sup> Hong Meng,<sup>\*b</sup> Junsu Jin,<sup>a</sup> and Jianguo Mi<sup>\*a</sup>

*<sup>a</sup> State Key Laboratory of Organic-Inorganic Composites, Beijing University of Chemical Technology, Beijing 100029, China*

*<sup>b</sup> State Key Laboratory of Chemistry and Utilization of Carbon Based Energy Resources, College of Chemistry, Xinjiang University, Urumqi, 830046, China*

\* Corresponding author, E-mail address: [menghong@mail.buct.edu.cn](mailto:menghong@mail.buct.edu.cn);

[mijg@mail.buct.edu.cn](mailto:mijg@mail.buct.edu.cn)

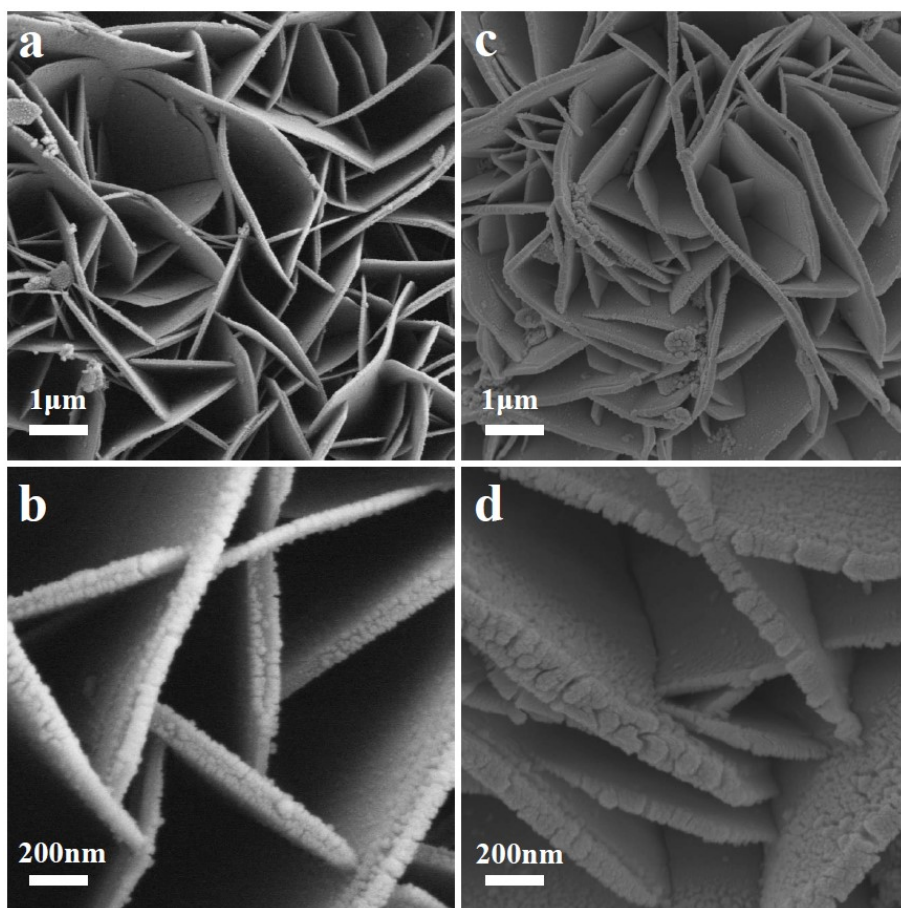

**Fig. S1** SEM images of (a, b) NiFe-LDH/NF; (c, d) NiFeOx/NF.

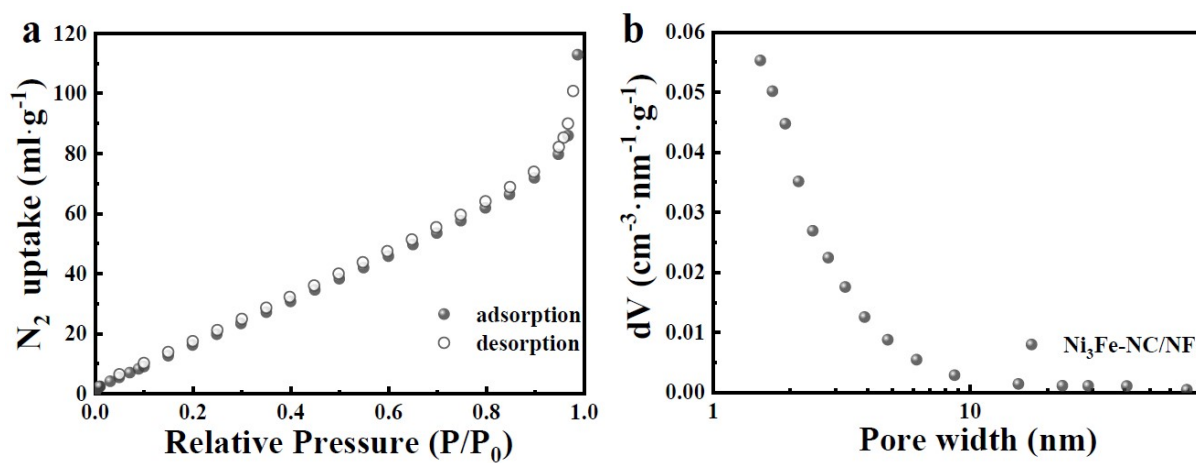

**Fig. S2** (a) N<sub>2</sub> adsorption-desorption isotherm at 77 K and (b) pore size distribution of Ni<sub>3</sub>Fe-NC/NF based on BJH method.

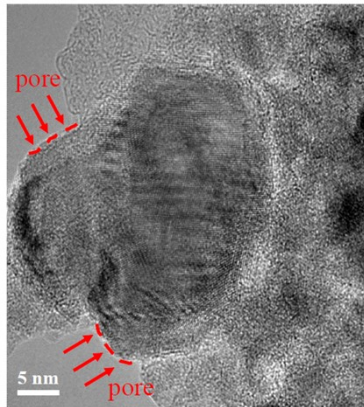

**Fig. S3** TEM image of Ni<sub>3</sub>Fe-NC/NF.

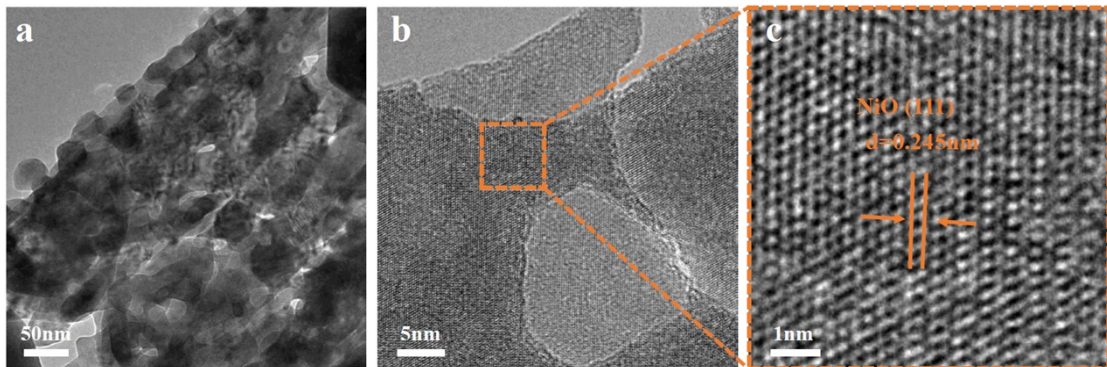

**Fig. S4** (a) TEM image; (b, c) HRTEM images of NiFeOx/NF.

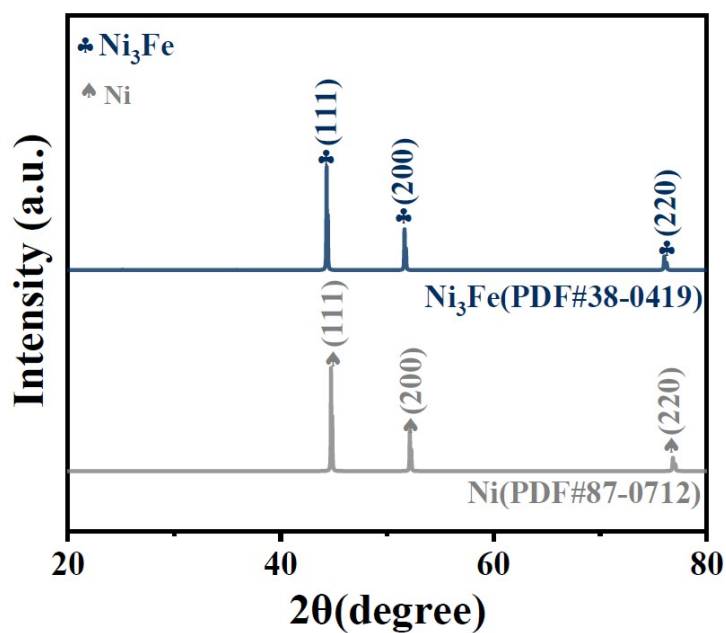

Fig. S5 XRD patterns of  $\text{Ni}_3\text{Fe}$  and Ni foam (NF).

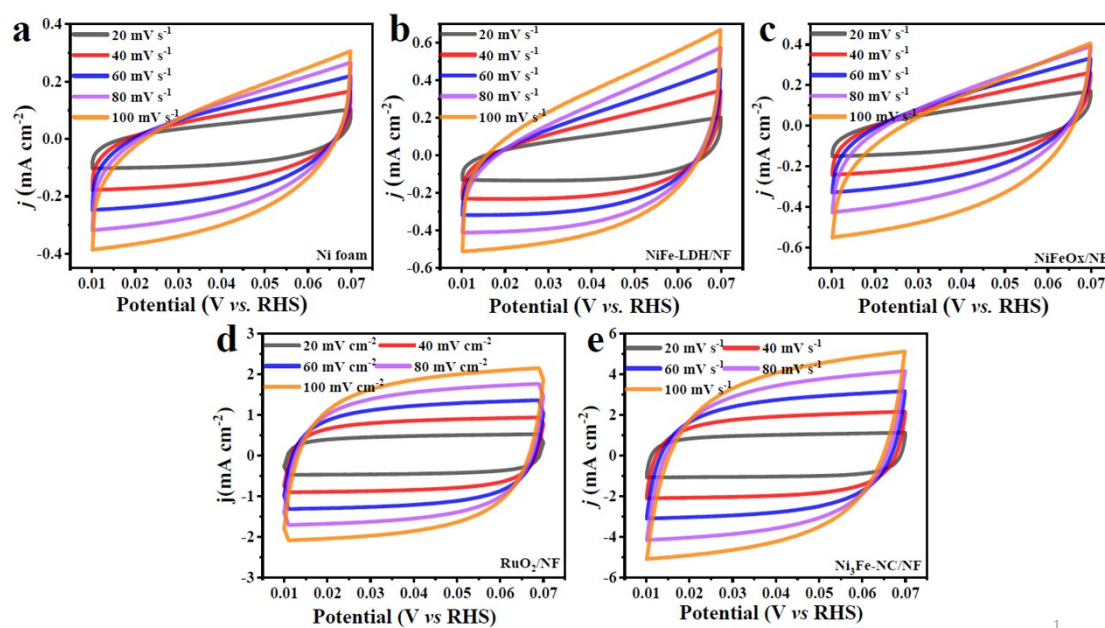

Fig. S6 CV curves of (a) NF, (b) NiFe-LDH/NF, (c) NiFeOx/NF, (d)  $\text{RuO}_2/\text{NF}$ , and (e)  $\text{Ni}_3\text{Fe-NC/NF}$  at various scan rates.

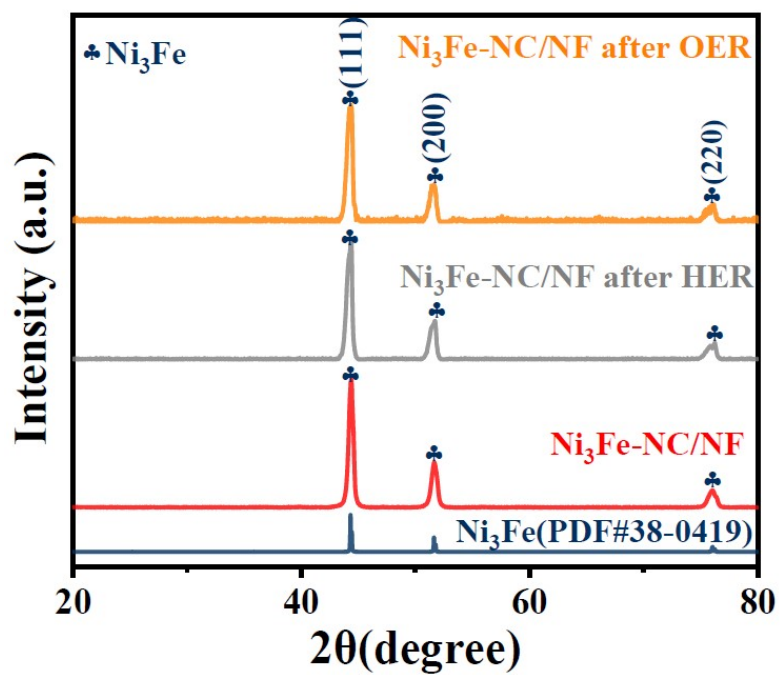

**Fig. S7** XRD patterns of  $\text{Ni}_3\text{Fe-NC/NF}$  and the samples collected after OER and HER stability tests.

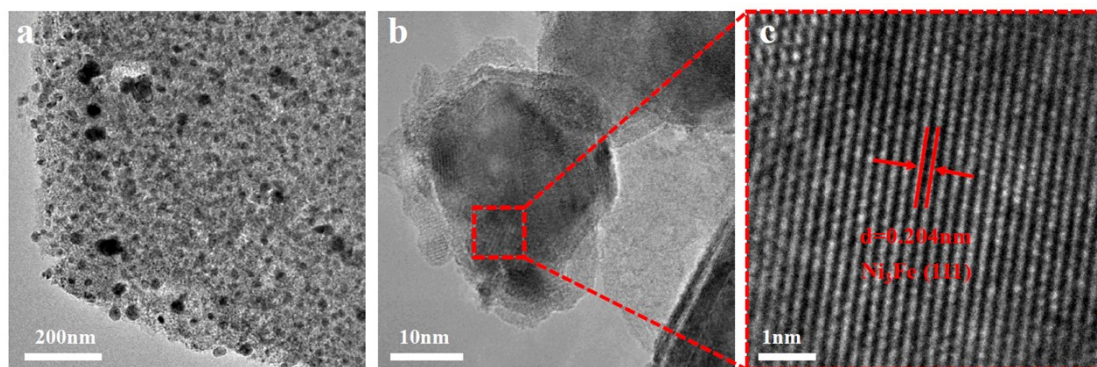

**Fig. S8** (a) TEM image; (b, c) HRTEM images of  $\text{Ni}_3\text{Fe-NC/NF}$  after OER stability test.

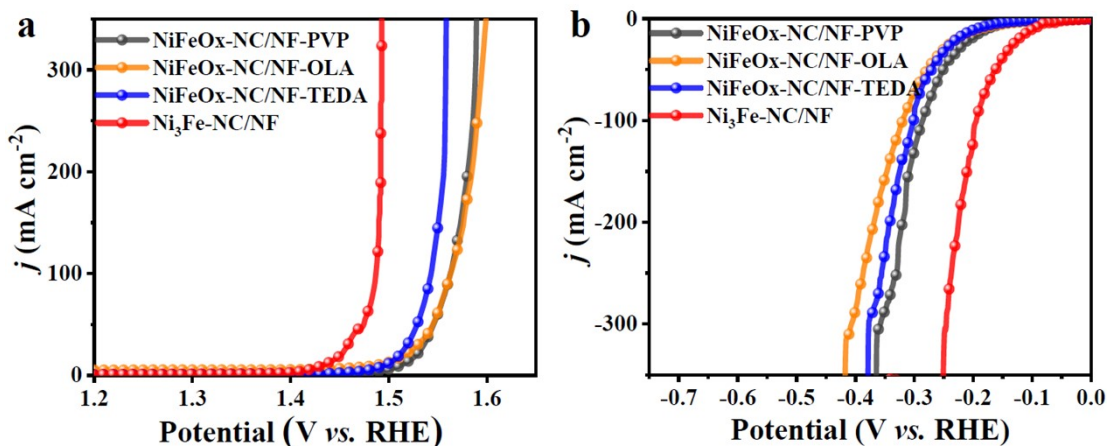

**Fig. S9** OER (a) and HER (b) polarization curves of NiFeO<sub>x</sub>-NC/NF-PVP, NiFeO<sub>x</sub>-NC/NF-OLA, NiFeO<sub>x</sub>-NC/NF-TEDA, and Ni<sub>3</sub>Fe-NC/NF in 1.0 M KOH solution with a scan rate of 5 mV s<sup>-1</sup>.

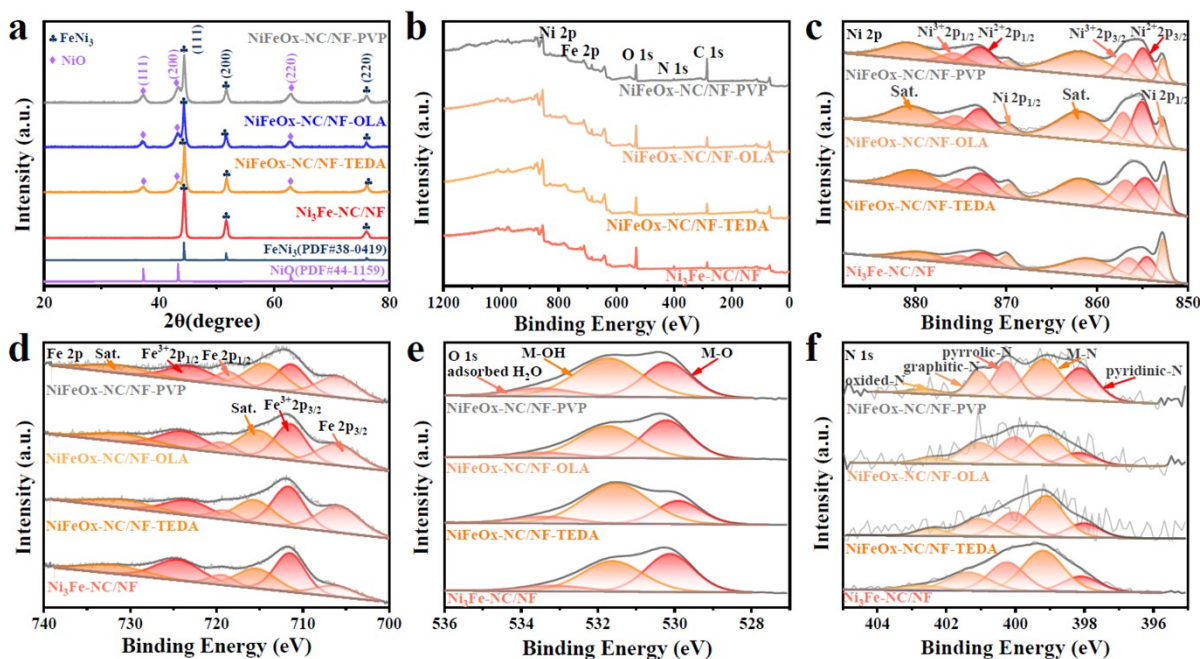

**Fig. S10** Compositional characterizations of NiFeO<sub>x</sub>-NC/NF-PVP, NiFeO<sub>x</sub>-NC/NF-OLA, NiFeO<sub>x</sub>-NC/NF-TEDA, and Ni<sub>3</sub>Fe-NC/NF. (a) XRD patterns, (b) XPS surveys, (c-f) high-resolution XPS spectra of (c) Ni 2p, (d) Fe 2p, (e) O 1s, and (f) N 1s.

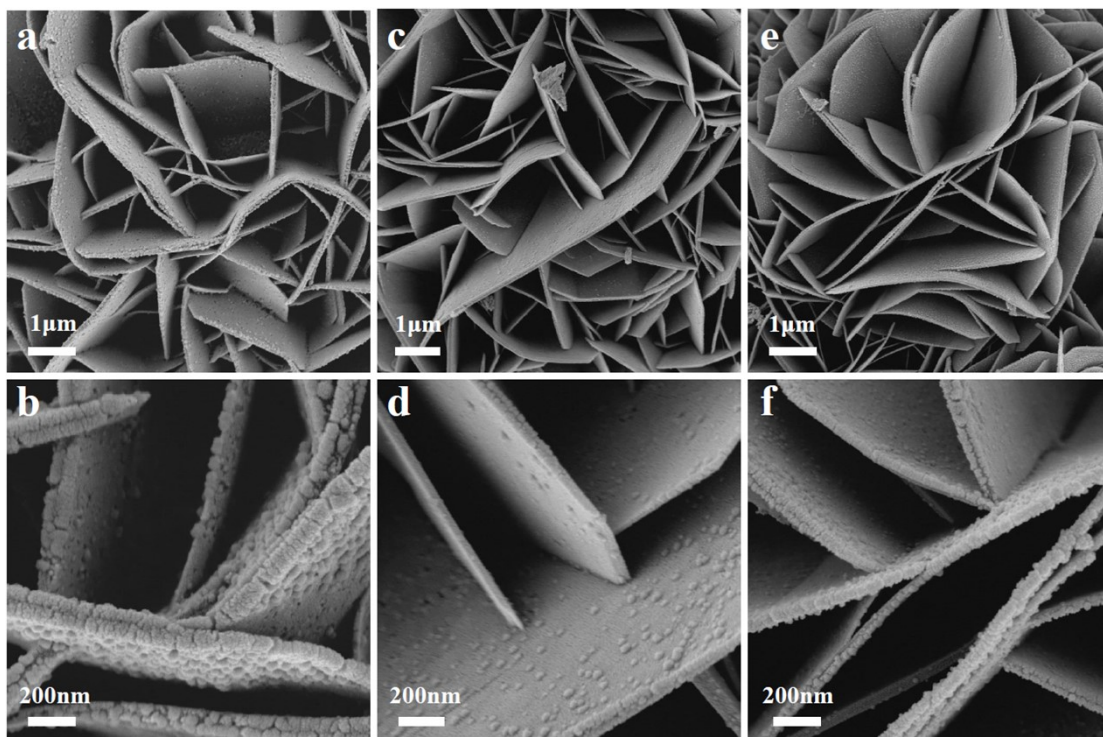

**Fig. S11** SEM images of (a, b) NiFeO<sub>x</sub>-NC/NF-PVP; (c, d) NiFeO<sub>x</sub>-NC/NF-OLA; (e, f) NiFeO<sub>x</sub>-NC/NF-TEDA.

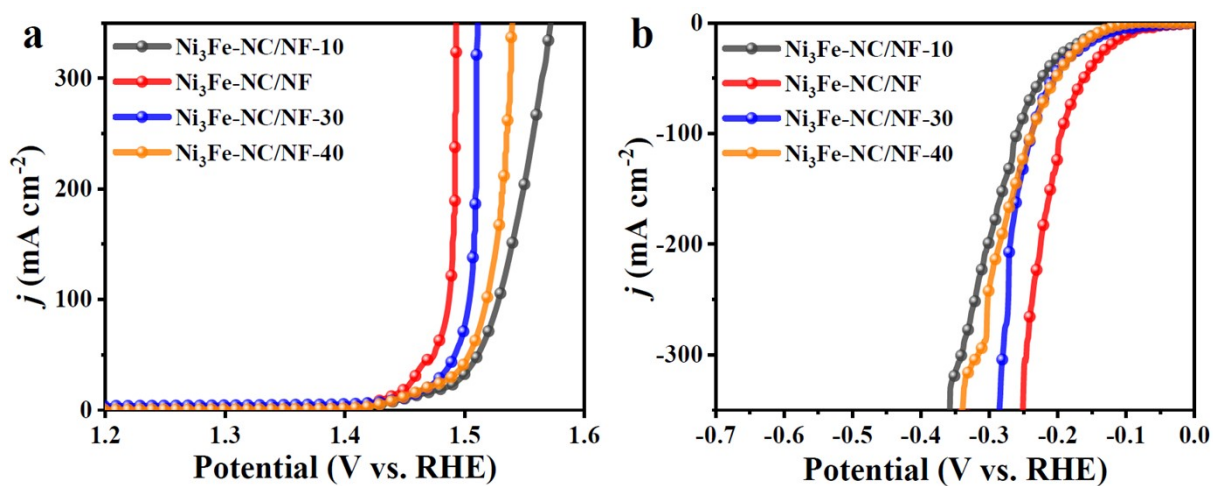

**Fig. S12** OER (a) and HER (b) polarization curves of Ni<sub>3</sub>Fe-NC/NF-10, Ni<sub>3</sub>Fe-NC/NF-30, Ni<sub>3</sub>Fe-NC/NF-40, and Ni<sub>3</sub>Fe-NC/NF in 1.0 M KOH solution with a scan rate of 5 mV s<sup>-1</sup>.

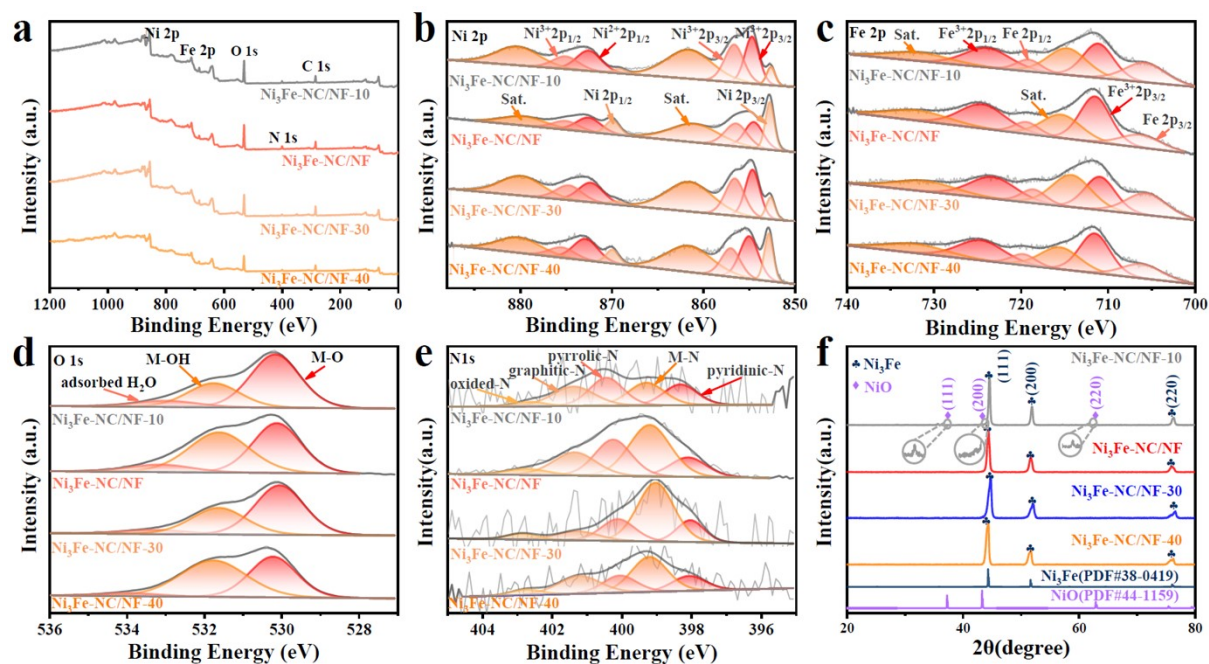

**Fig. S13** Compositional characterizations of Ni<sub>3</sub>Fe-NC/NF-10, Ni<sub>3</sub>Fe-NC/NF, Ni<sub>3</sub>Fe-NC/NF-30, and Ni<sub>3</sub>Fe-NC/NF-40. (a) XPS surveys, (b-e) high-resolution XPS spectra of (b) Ni 2p, (c) Fe 2p, (d) O 1s, (e) N 1s, and (f) XRD patterns.

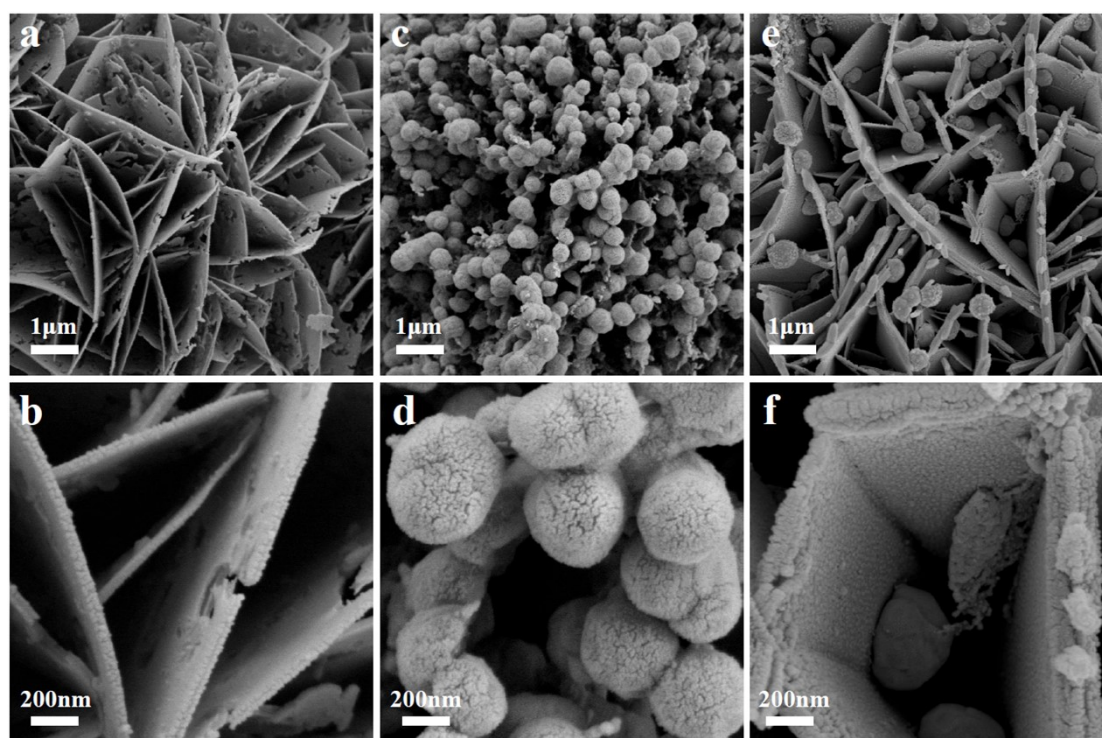

**Fig. S14** SEM images of (a, b) Ni<sub>3</sub>Fe-NC/NF-10; (c, d) Ni<sub>3</sub>Fe-NC/NF-30; (e, f) Ni<sub>3</sub>Fe-NC/NF-



40.

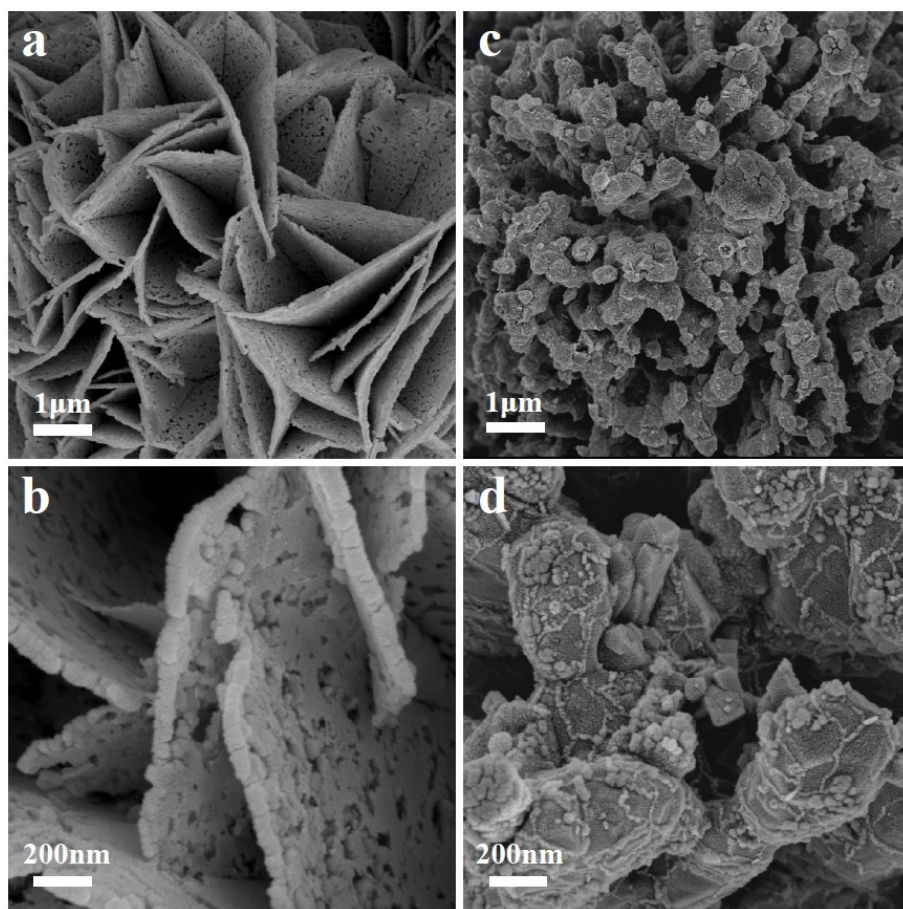

**Fig. S15** SEM images of (a, b) NiFeOx-NC/NF-400; (c, d) NiFeOx-NC/NF-600.

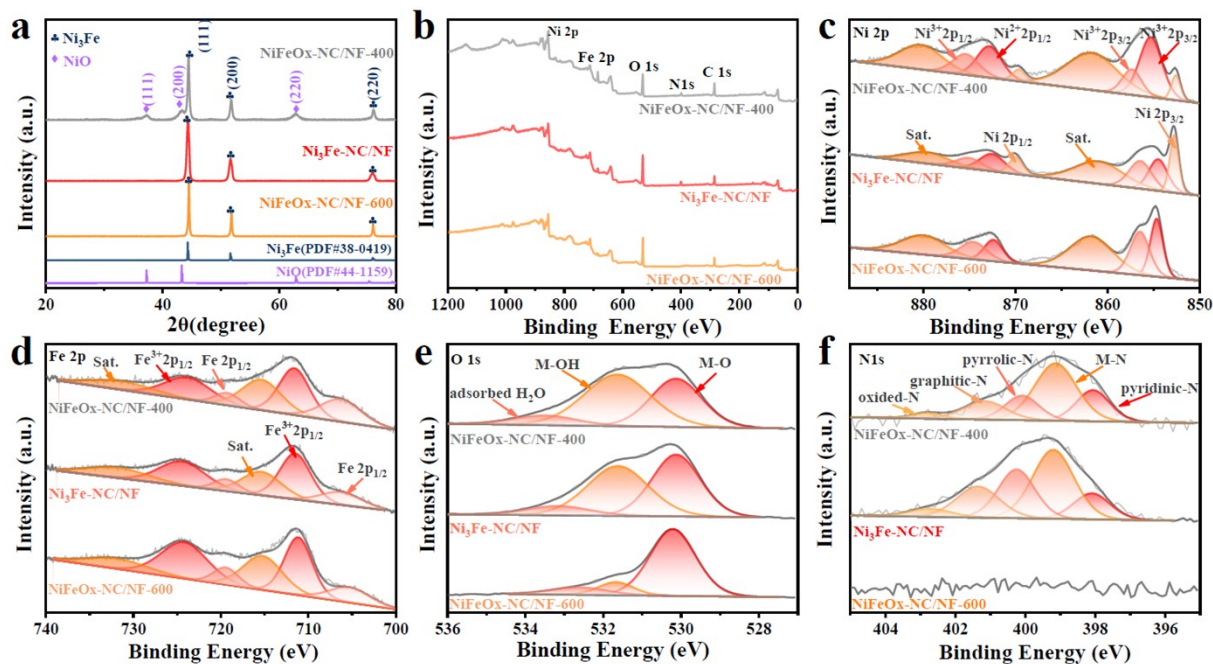

**Fig. S16** Compositional characterizations of NiFeO<sub>x</sub>-NC/NF-400, Ni<sub>3</sub>Fe-NC/NF, and NiFeO<sub>x</sub>-NC/NF-600. (a) XRD patterns, (b) XPS surveys, (c-f) high-resolution XPS spectra of (c) Ni 2p, (d) Fe 2p, (e) O 1s, and (f) N 1s.

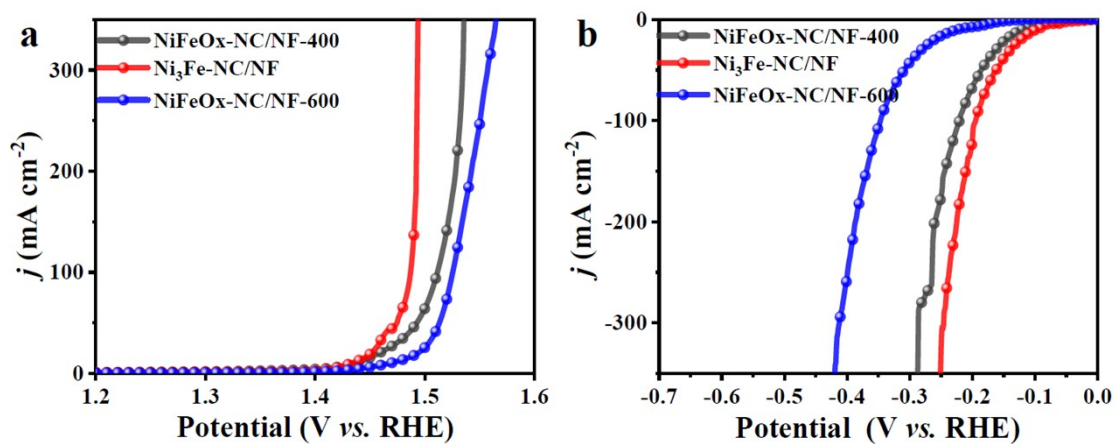

**Fig. S17** OER (a) and HER (b) polarization curves of NiFeO<sub>x</sub>-NC/NF-400, Ni<sub>3</sub>Fe-NC/NF, and NiFeO<sub>x</sub>-NC/NF-600 in 1.0 M KOH solution with a scan rate of 5 mV s<sup>-1</sup>.

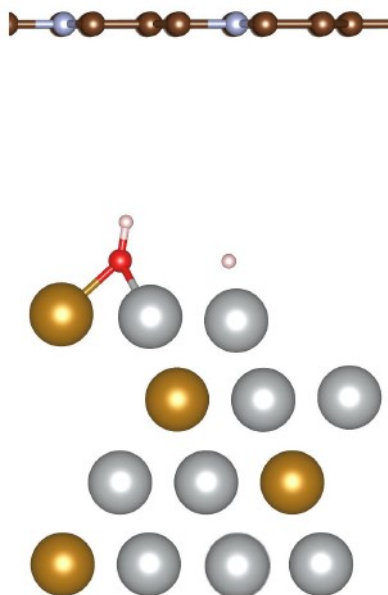

**Fig. S18** The geometric structure of \*H on Ni<sub>3</sub>Fe-OH/NC.

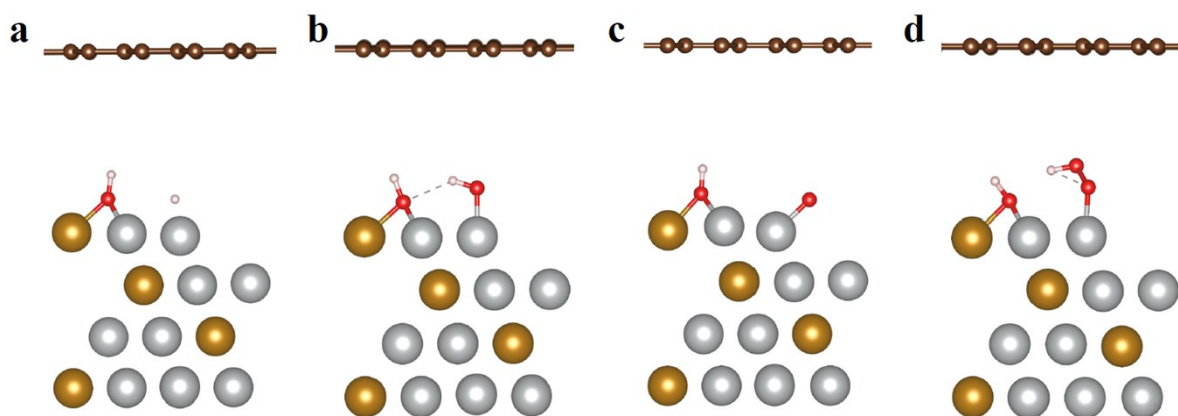

**Fig. S19** The geometric structures of (a) \*H, (b-c) \*OH, \*O, and \*OOH on Ni<sub>3</sub>Fe-OH/C.

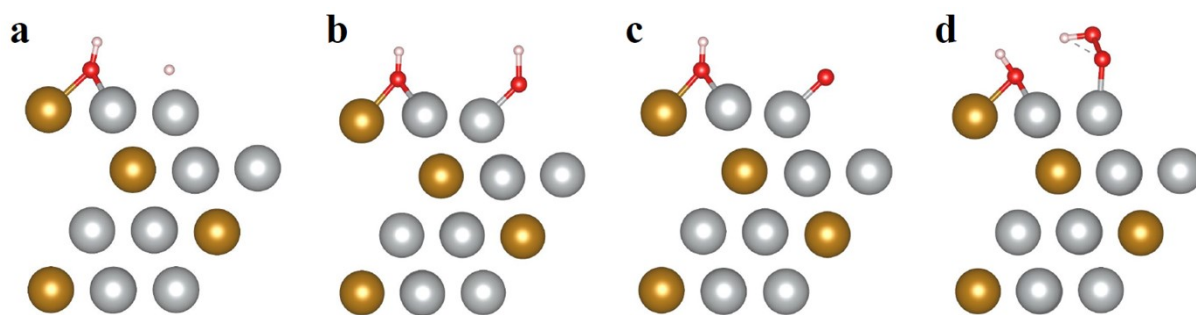

**Fig. S20** The geometric structures of (a) \*H, (b-c) \*OH, \*O, and \*OOH on Ni<sub>3</sub>Fe-OH.

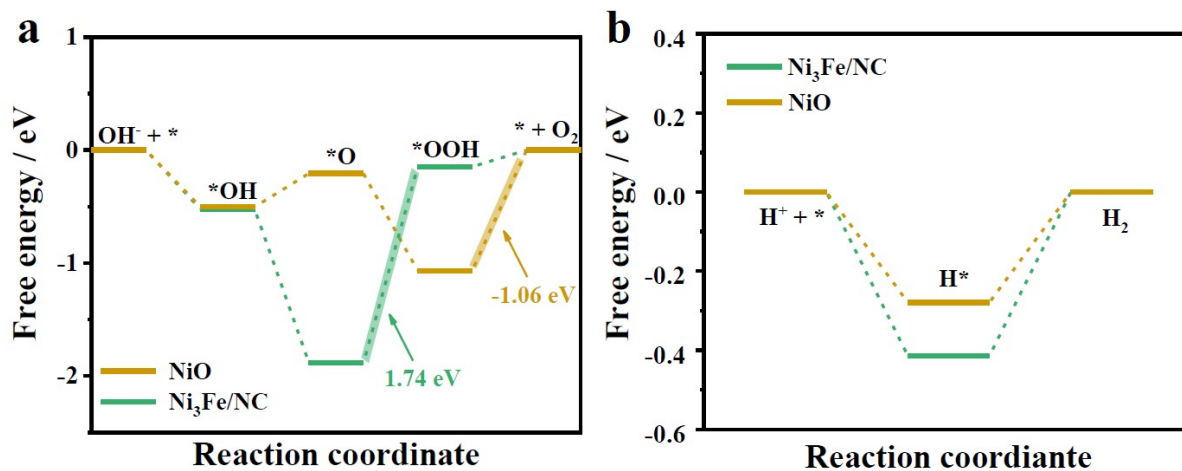

**Fig. S21** (a) Gibbs free energy diagram over  $\text{Ni}_3\text{Fe}/\text{NC}$  and  $\text{NiO}$  for the OER at an equilibrium potential of 1.23 V. The highlights indicate the rate-determining step with the value of the limiting energy barrier. (b) Gibbs free energy diagram for the HER.

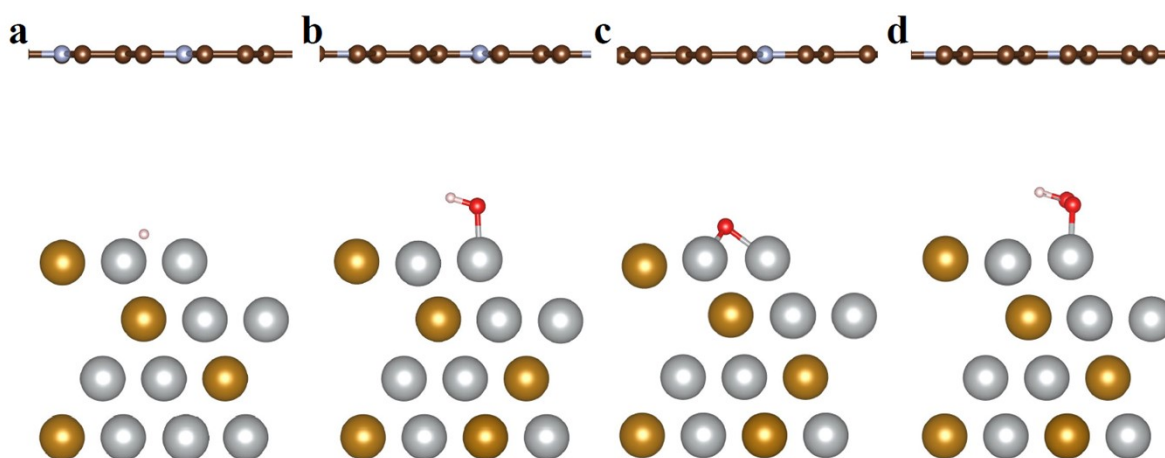

**Fig. S22** The geometric structures of (a)  $^*\text{H}$ , (b-c)  $^*\text{OH}$ ,  $^*\text{O}$  and  $^*\text{OOH}$  on  $\text{Ni}_3\text{Fe}/\text{NC}$ .

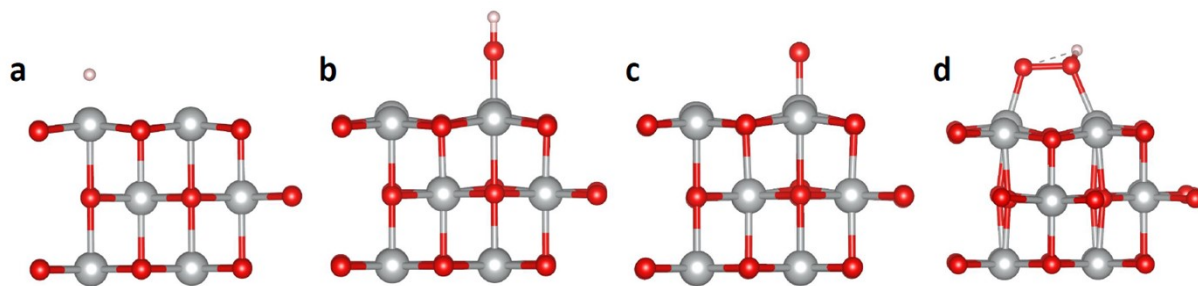

**Fig. S23** The geometric structures of (a) \*H, (b-c) \*OH, \*O and \*OOH on NiO.

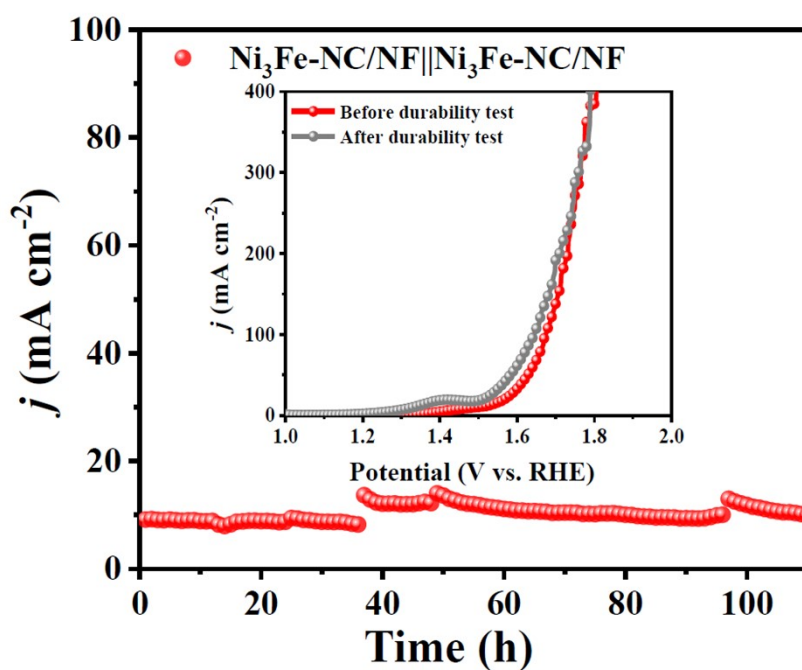

**Fig. S24** Chronoamperometry test of Ni<sub>3</sub>Fe-NC/NF||Ni<sub>3</sub>Fe-NC/NF at the potential of 1.49V in 1 M KOH solution. Inset image shows the LSV polarization curves of Ni<sub>3</sub>Fe-NC/NF||Ni<sub>3</sub>Fe-NC/NF before and after long-term stability test.

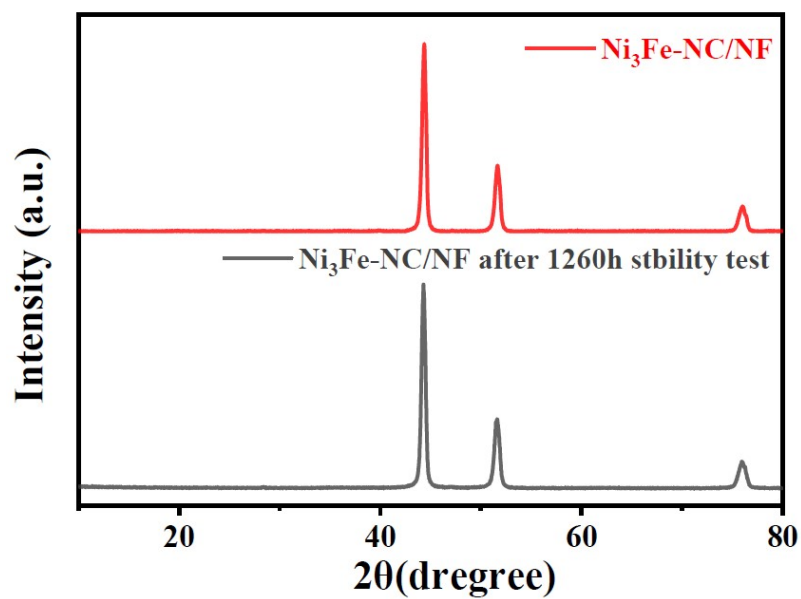

**Fig. S25** XRD patterns of Ni<sub>3</sub>Fe-NC/NF and the sample collected after 1260 h stability test for all water splitting.

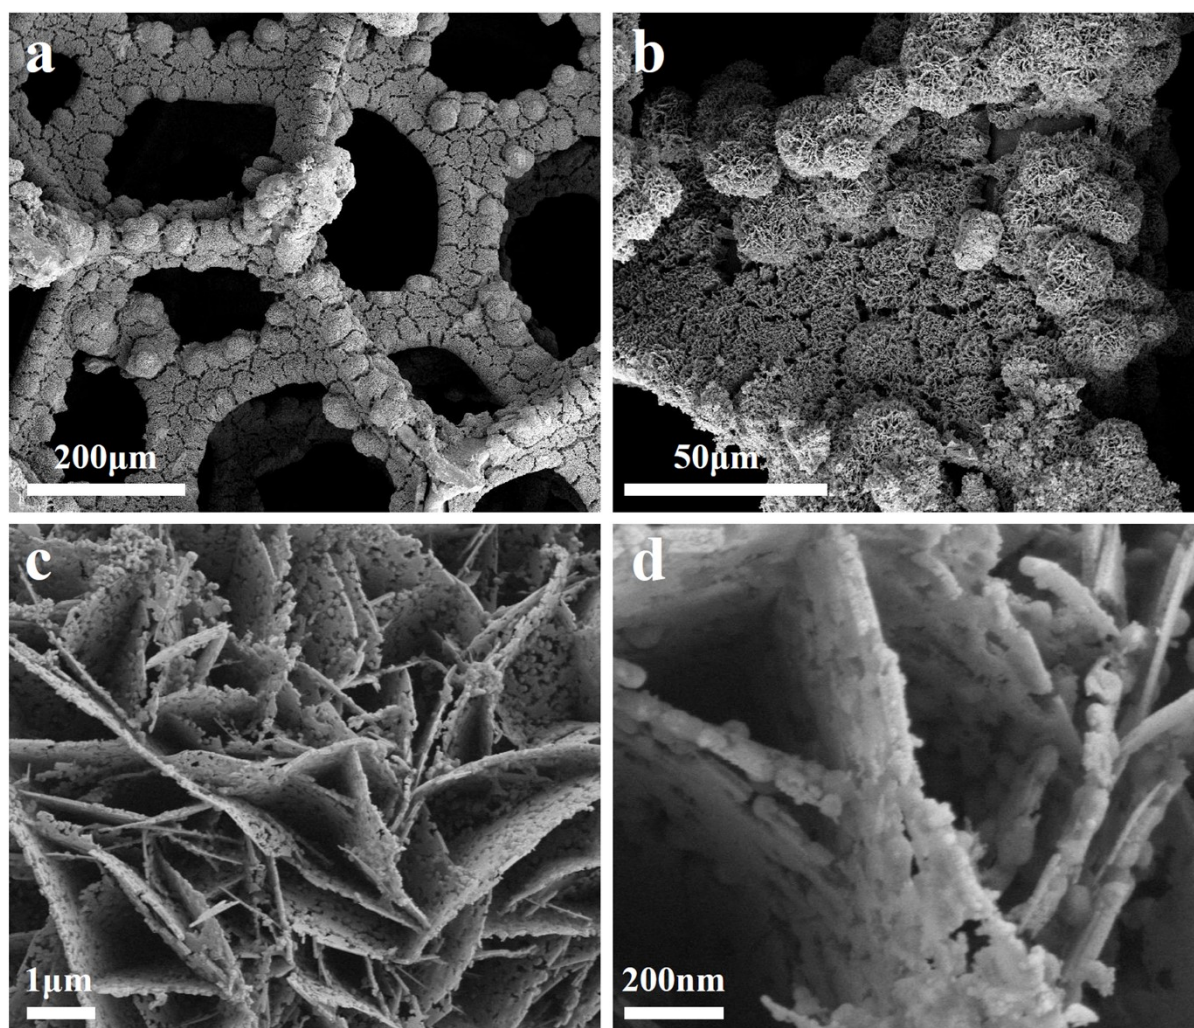

**Fig. S26** (a-d) SEM images of Ni<sub>3</sub>Fe-NC/NF after 1260 h stability test for all water splitting.

**Table S1.** Comparison of OER and HER performance of Ni<sub>3</sub>Fe-NC/NF in 1M KOH with other reported bifunctional electrocatalysts.

| Samples                          | OER $\eta_{10}$<br>(mV) | HER $\eta_{10}$<br>(mV) | Ref.no                                                      |
|----------------------------------|-------------------------|-------------------------|-------------------------------------------------------------|
| fcc-Ni <sub>3</sub> Fe/C         | 201                     | 70                      | <i>Adv. Funct.Mater.</i> , 2021, <b>32</b> , 2109709        |
| Ni <sub>2</sub> Fe@NC            | 237                     | 198                     | <i>Electrochim. Acta</i> , 2021, <b>389</b> , 138785        |
| NF-Na-Fe-Pt                      | 261                     | 31                      | <i>Appl. Catal. B</i> , 2021, <b>297</b> , 120395           |
| CS-NFO@PNC-700                   | 217                     | 200                     | <i>Appl. Catal. B</i> , 2022, <b>300</b> , 120752           |
| CoP@FeCoP/NC                     | 238                     | 141                     | <i>Chem. Eng. J.</i> , 2021, <b>403</b> , 120752            |
| Ni <sub>3</sub> FeN/r-Go         | 270                     | 94                      | <i>ACS Nano</i> , 2018, <b>12</b> , 245-253                 |
| NiFeOP                           | 310                     | 209                     | <i>ACS Sustain. Chem. Eng.</i> , 2021, <b>9</b> , 9436-9443 |
| NiCo <sub>2</sub> S <sub>4</sub> | 243                     | 80                      | <i>Adv. Funct. Mater.</i> , 2019, <b>29</b> , 1807031       |

|                                         |            |           |                                                        |
|-----------------------------------------|------------|-----------|--------------------------------------------------------|
| NiFe-LDH@NiCu                           | 218        | 66        | <i>Adv. Mater.</i> , 2019, <b>31</b> , e1806769        |
| Ni <sub>3</sub> FeN/Ni <sub>3</sub> Fe  | 250        | 125       | <i>J. Mater. Chem. A</i> , 2021, <b>9</b> , 4036-4043  |
| NiFe@OCC                                | 281        | 256       | <i>ChemElectroChem</i> , 2019, <b>6</b> , 2497-2502    |
| NiFe(II,III)-LDH                        | 220        | 120       | <i>Small</i> , 2019, <b>15</b> , e1902551              |
| NiO/NiFe <sub>2</sub> O <sub>4</sub>    | 279        | 282       | <i>Small</i> , 2021, <b>17</b> , e2103501              |
| Cu <sub>3</sub> P-Cu <sub>2</sub> O/NPC | 286        | 138       | <i>Chem. Eng. J.</i> , 2022, <b>427</b> , 130946       |
| 10: MoCo-VS <sub>2</sub> /CC            | 248        | 160       | <i>J. Mater. Chem. A</i> , 2022, <b>10</b> , 9067-9079 |
| Mo <sub>2</sub> NiB <sub>2</sub>        | 280        | 160       | <i>Small</i> , 2022, <b>18</b> , e2104303              |
| <b>Ni<sub>3</sub>Fe-NC/NF</b>           | <b>203</b> | <b>98</b> | <b>This work</b>                                       |

**Table S2.** Comparison of the cell voltage of overall water-splitting for Ni<sub>3</sub>Fe-NC/NF in 1M KOH and other bifunctional electrocatalysts.

| <b>Samples</b>                                 | <b>E (V)@<br/>10 mA cm<sup>-2</sup></b> | <b>Ref.no</b>                                               |
|------------------------------------------------|-----------------------------------------|-------------------------------------------------------------|
| hcp-Ni <sub>3</sub> Fe/C                       | 1.54                                    | <i>Adv. Funct.Mater.</i> , 2021, <b>32</b> , 2109709        |
| Ni <sub>2</sub> Fe@NC                          | 1.81                                    | <i>Electrochim. Acta</i> , 2021, <b>389</b> , 138785        |
| NF-Na-Fe-Pt                                    | 1.56                                    | <i>Appl. Catal. B</i> , 2021, <b>297</b> , 120395           |
| CS-NFO@PNC-700                                 | 1.66                                    | <i>Appl. Catal. B</i> , 2022, <b>300</b> , 120752           |
| CoP@FeCoP/NC                                   | 1.68                                    | <i>Chem. Eng. J.</i> , 2021, <b>403</b> , 120752            |
| Ni <sub>3</sub> FeN/r-Go                       | 1.6                                     | <i>ACS Nano</i> , 2018, <b>12</b> , 245-253                 |
| NiFeOP                                         | 1.69                                    | <i>ACS Sustain. Chem. Eng.</i> , 2021, <b>9</b> , 9436-9443 |
| NiCo <sub>2</sub> S <sub>4</sub>               | 1.58                                    | <i>Adv. Funct. Mater.</i> , 2019, <b>29</b> , 1807031       |
| Ni <sub>3</sub> FeN/Ni <sub>3</sub> Fe         | 1.61                                    | <i>J. Mater. Chem. A</i> , 2021, <b>9</b> , 4036-4043       |
| NiFe@OCC                                       | 1.7                                     | <i>ChemElectroChem</i> , 2019, <b>6</b> , 2497-2502         |
| NiFe(II,III)-LDH                               | 1.54                                    | <i>Small</i> , 2019, <b>15</b> , e1902551                   |
| Cu <sub>3</sub> P-Cu <sub>2</sub> O/NPC        | 1.57                                    | <i>Chem. Eng. J.</i> , 2022, <b>427</b> , 130946            |
| 10: MoCo-VS <sub>2</sub> /CC                   | 1.54                                    | <i>J. Mater. Chem. A</i> , 2022, <b>10</b> , 9067-9079      |
| Mo <sub>2</sub> NiB <sub>2</sub>               | 1.57                                    | <i>Small</i> , 2022, <b>18</b> , e2104303                   |
| CuNi@NiFeCu/CP                                 | 1.51                                    | <i>Appl. Catal. B</i> , 2021, <b>298</b> , 120600           |
| NiFeOx(OH) <sub>y</sub> @MoS <sub>2</sub> /rGo | 1.57                                    | <i>Chem. Eng. J.</i> , 2020, <b>397</b> , 125454            |
| NiFeP@NC/Ni <sub>2</sub> P                     | 1.57                                    | <i>Small</i> , 2021, <b>17</b> , e2006860                   |
| <b>Ni<sub>3</sub>Fe-NC/NF</b>                  | <b>1.49</b>                             | <b>This work</b>                                            |

**Table S3.** Comparison of the stability of overall water splitting for Ni<sub>3</sub>Fe-NC/NF in 1M KOH with other reported bifunctional catalysts.

| <b>Samples</b> | <b><i>j</i></b> | <b>Tim</b> | <b>Ref.no</b> |
|----------------|-----------------|------------|---------------|
|----------------|-----------------|------------|---------------|



|                                                | (mA cm <sup>-2</sup> ) | e           |                                                       |
|------------------------------------------------|------------------------|-------------|-------------------------------------------------------|
|                                                |                        | (h)         |                                                       |
| hcp-Ni <sub>3</sub> Fe/C                       | 10                     | 36          | <i>Adv. Funct. Mater.</i> , 2021, <b>32</b> , 2109709 |
| NF-Na-Fe-Pt                                    | 10                     | 12          | <i>Appl. Catal. B</i> , 2021, <b>297</b> , 120395     |
| Ni <sub>3</sub> FeN/r-Go                       | 10                     | 100         | <i>ACS Nano</i> , 2018, <b>12</b> , 245-253           |
| d-Ni <sub>3</sub> FeN/Ni <sub>3</sub> Fe       | 70                     | 90          | <i>J. Mater. Chem. A</i> , 2021, <b>9</b> , 4036-4043 |
| CuNi@NiFeCu/CP                                 | 80                     | 50          | <i>Appl. Catal. B</i> , 2021, <b>298</b> , 120600     |
| NiFeOx(OH) <sub>y</sub> @MoS <sub>2</sub> /rGo | 20                     | 12          | <i>Chem. Eng. J.</i> , 2020, <b>397</b> , 125454      |
| NiFeRh-LDH                                     | 100                    | 150         | <i>Appl. Catal. B</i> , 2021, <b>284</b> , 119740     |
| Ni <sub>3</sub> N-Co <sub>3</sub> N/C          | 10                     | 168         | <i>Appl. Catal. B</i> , 2021, <b>297</b> , 120461     |
| FNP                                            | 10                     | 80          | <i>Chem. Eng. J.</i> , 2020, <b>390</b> , 124515      |
| CuO@CoZn-LDH/CF                                | 10                     | 48          | <i>Chem. Eng. J.</i> , 2021, <b>414</b> , 128809      |
| VCoCox@NF                                      | 10                     | 70          | <i>Chem. Eng. J.</i> , 2022, <b>430</b> , 132623      |
| Fe/Mo <sub>2</sub> C-NCS                       | 100                    | 24          | <i>Chem. Eng. J.</i> , 2022, <b>431</b> , 134126      |
| CoFe-250                                       | 60                     | 24          | <i>Chem. Eng. J.</i> , 2022, <b>432</b> , 134275      |
| ZCNP/NF                                        | 20                     | 200         | <i>Adv. Funct. Mater.</i> , 2019, <b>29</b> , 1808889 |
| a-CoMoPx/CF                                    | 100                    | 100         | <i>Adv. Funct. Mater.</i> , 2020, <b>30</b> , 2003889 |
| <b>Ni<sub>3</sub>Fe-NC/NF</b>                  | <b>160</b>             | <b>1260</b> | <b>This work</b>                                      |
